# Supplementary figures and images for: Involvement of Hedgehog and FGF signalling in the lamprey telencephalon: evolution of regionalization and dorsoventral patterning of the vertebrate forebrain
Source: Oxford University Press journal article supplement (doi:10.1242/dev.059360), 2011-02-22

**A**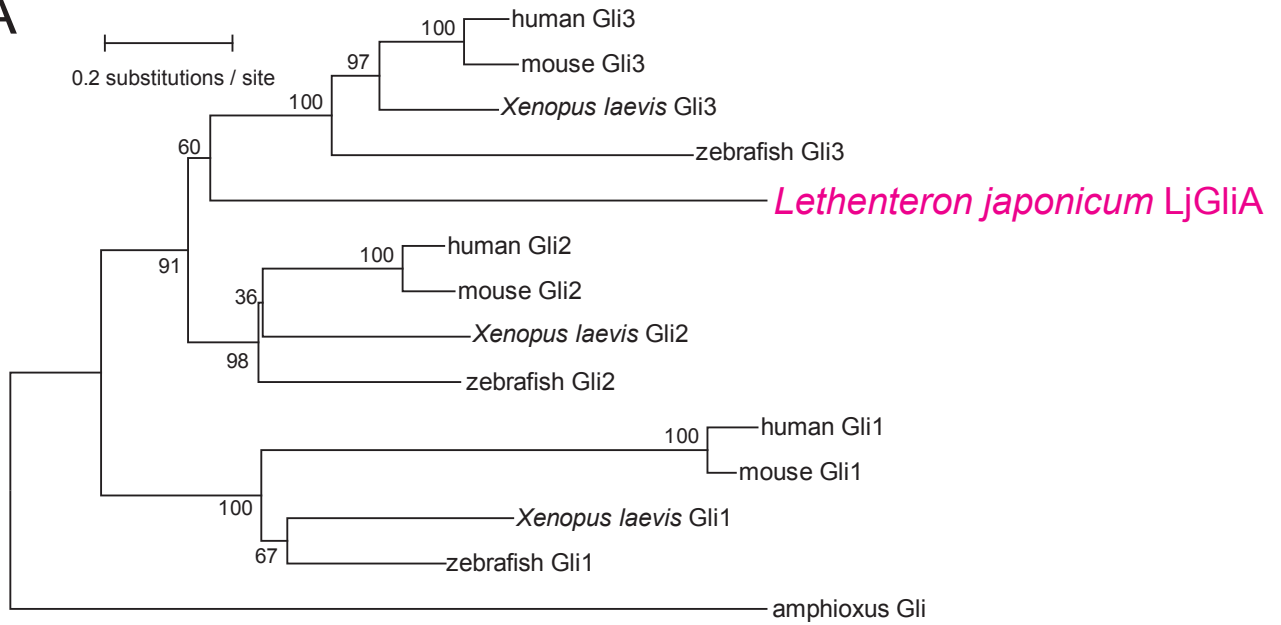**B**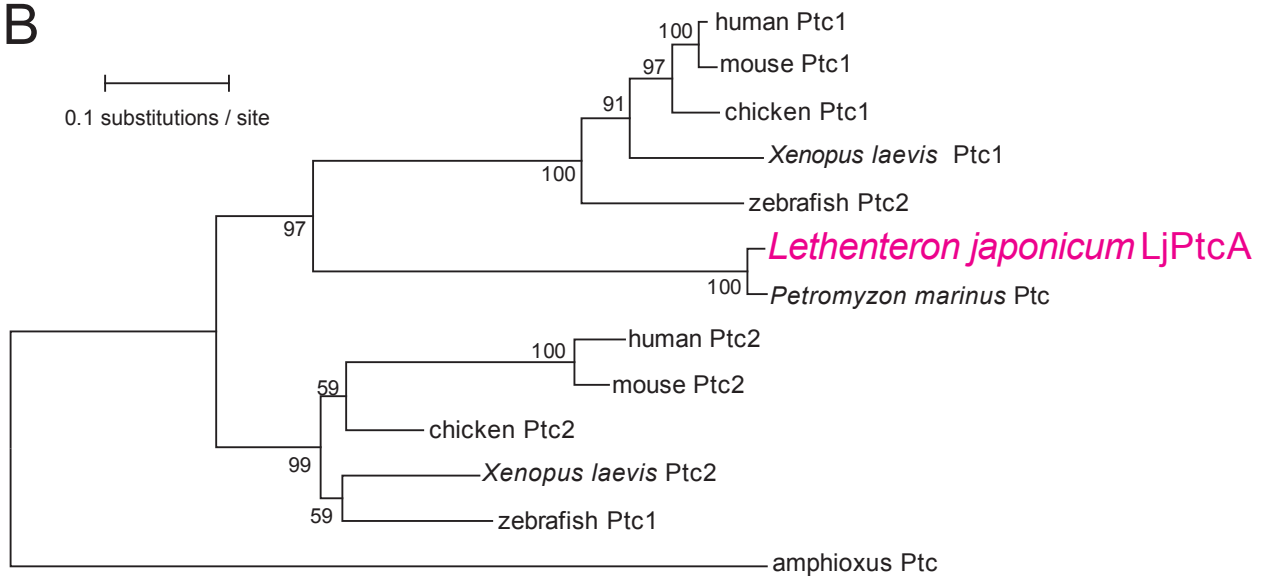**C**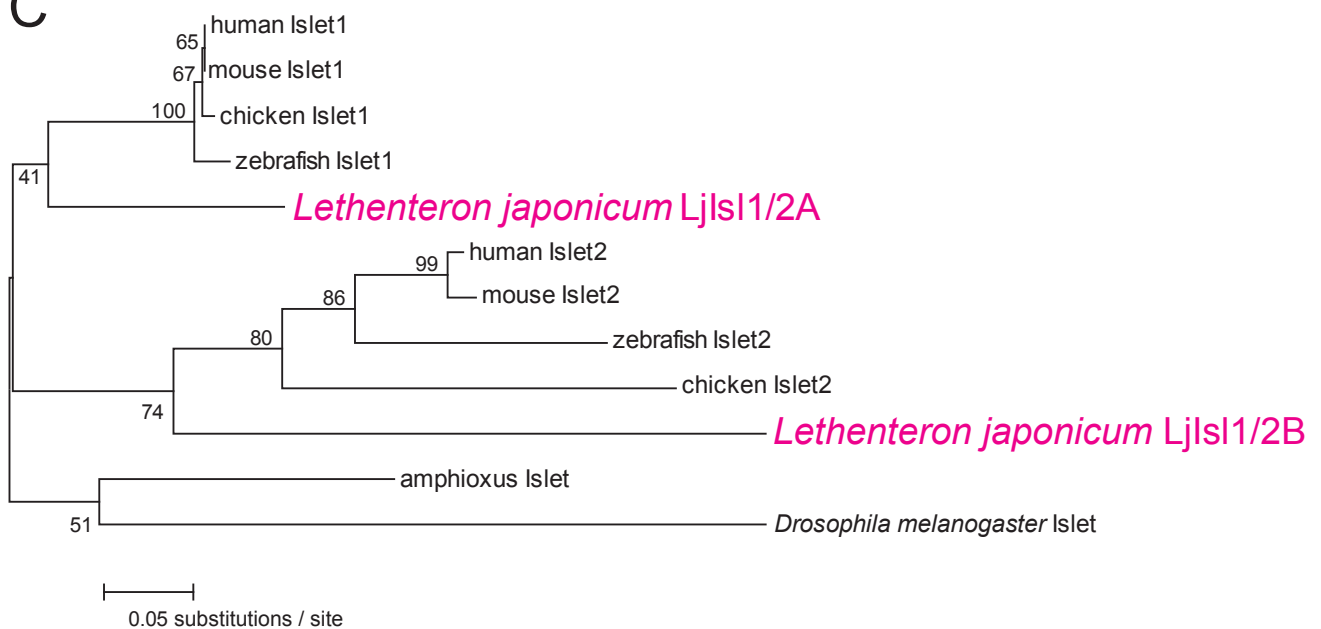

Supplement: dev059360figs2.pdf [file dev059360figs2.pdf]
